# Supplementary material for: In situ synthesis of novel urchin-like ZnS/Ni3S2@Ni composite with a core–shell structure for efficient electromagnetic absorption
Source: Royal Society of Chemistry journal article supplement (doi:10.1039/c5tc02063h), 2015-01-01
Supplement: c5tc02063h1.pdf [file c5tc02063h1.pdf]

**In-situ synthesis of novel urchin-like ZnS/Ni<sub>3</sub>S<sub>2</sub>@Ni composite  
with core-shell structure as an efficient electromagnetic  
absorption absorber**

Biao Zhao <sup>a</sup>, Gang Shao <sup>a\*</sup>, Bingbing Fan <sup>a</sup>, Wanyu Zhao <sup>a</sup>, Shihao Zhang <sup>a</sup>, Keke  
Guan <sup>a</sup>, Rui Zhang <sup>a,b\*</sup>

<sup>a</sup> School of Materials Science and Engineering, Zhengzhou University,  
Zhengzhou, Henan 450001, PR China

<sup>b</sup> Laboratory of Aeronautical Composites, Zhengzhou Institute of Aeronautical  
Industry Management, Zhengzhou 450046, China

\* Corresponding Author.

Dr. Gang Shao

E-mail address: gang\_shao@zzu.edu.cn

Prof. Rui Zhang

Tel: +86-371-60632007

Fax: +86-371-60632600

E-mail address: zhangray@zzu.edu.cn

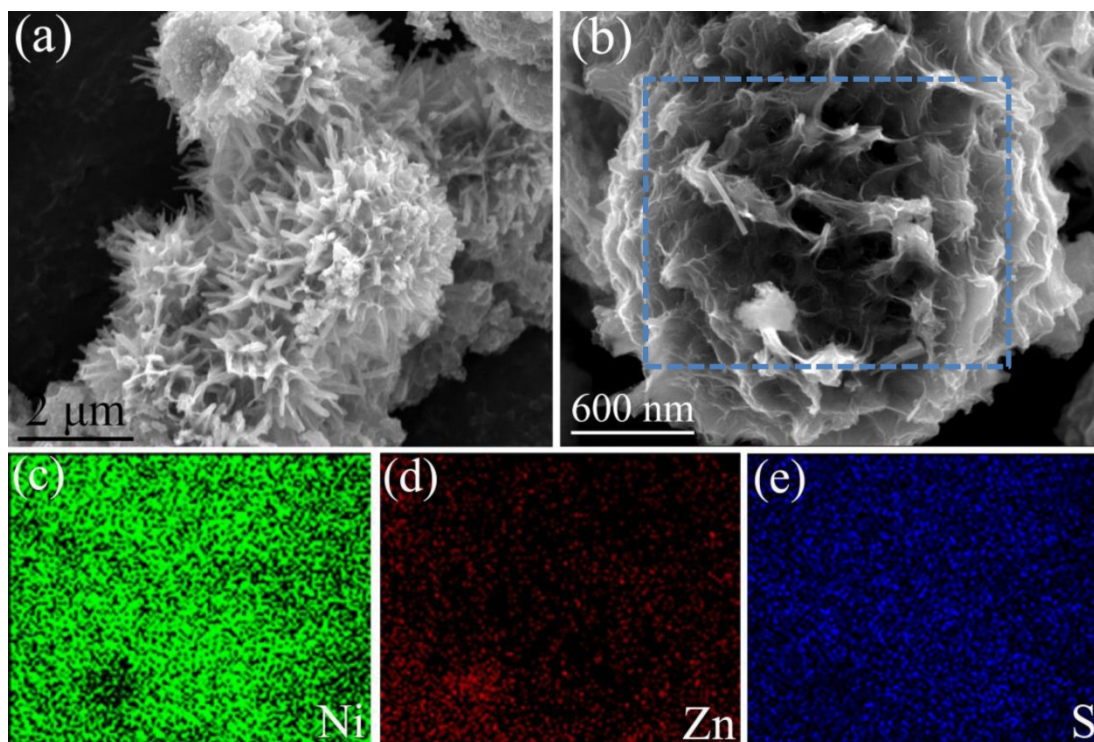

Figure S1 (a,b) FESEM image of ZnS/Ni<sub>3</sub>S<sub>2</sub>@Ni composites, and (c–e) corresponding elemental mappings of Ni, Zn, and S.
